# Supplementary material for: Chelating tris(amidate) ligands: versatile scaffolds for nickel(ii)
Source: Royal Society of Chemistry journal article supplement (doi:10.1039/b914301g), 2009-11-17

## Supporting Information

For

### Chelating tris(amidate) ligands: versatile scaffolds for nickel(II)

Matthew B. Jones,<sup>a</sup> Brian S. Newell,<sup>b</sup> Wesley A. Hoffert,<sup>b</sup> Kenneth I. Hardcastle,<sup>a</sup> Matthew P. Shores<sup>b</sup>  
and Cora E. MacBeth<sup>\*a</sup>

<sup>a</sup>Department of Chemistry, Emory University, Atlanta, GA, USA. Fax: 01 404-727-6586; Tel: 01-404-727-7033; E-mail: cmacbet@emory.edu

<sup>b</sup>Department of Chemistry, Colorado State University, Fort Collins, CO, USA. Tel: 01-970-491-6033; E-mail: shores@lamar.colostate.edu

#### **Table of Contents**

#### **Page**

|                                                                                                                                                                               |    |
|-------------------------------------------------------------------------------------------------------------------------------------------------------------------------------|----|
| Figure S1 Cyclic voltammogram of [Et <sub>4</sub> N] <sub>2</sub> [Ni(L <sup>iPr</sup> )(CN)]                                                                                 | S2 |
| Figure S2 Temperature dependant magnetic susceptibility for Ph <sub>4</sub> P[Ni(L <sup>iPr</sup> )]                                                                          | S2 |
| Figure S3 Expansion of magnetic susceptibility of [Et <sub>4</sub> N] <sub>3</sub> [CoNi(L <sup>iPr</sup> ) <sub>2</sub> (μ <sub>2</sub> -CN)]<br>collected at various fields | S3 |
| Figure S4 Magnetic susceptibility of [Et <sub>4</sub> N] <sub>3</sub> [CoNi(L <sup>iPr</sup> ) <sub>2</sub> (μ <sub>2</sub> -CN)]                                             | S3 |
| Figure S5 Magnetic susceptibility of [Et <sub>4</sub> N] <sub>3</sub> [CoNi(L <sup>iPr</sup> ) <sub>2</sub> (μ <sub>2</sub> -CN)]<br>(D allowed to refine freely)             | S4 |

**Figure S1.** Cyclic voltammogram of  $[\text{Et}_4\text{N}]_2[\text{Ni}(\text{L}^{\text{iPr}})(\text{CN})]$  recorded in DMF (0.2 M tetrabutylammonium hexafluorophosphate  $\text{TBAPF}_6$ ). Scan rate 50 mV/sec (vs.  $\text{Fc}/\text{Fc}^+$ ).

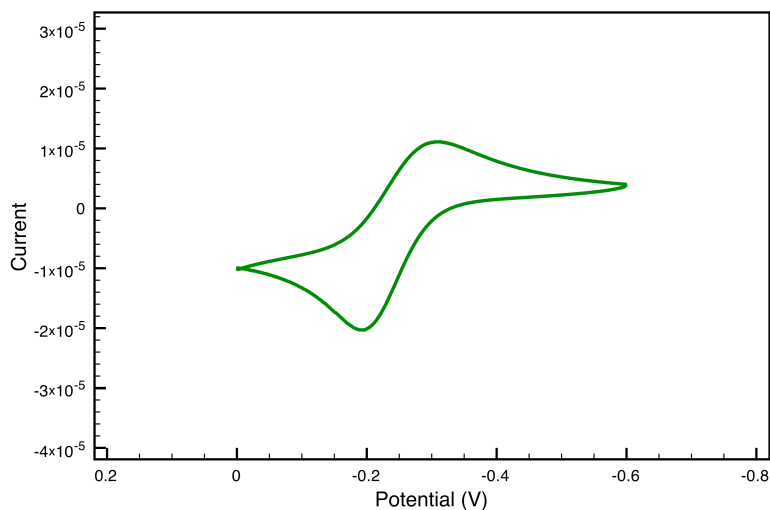

**Figure S2.** Temperature dependence of the magnetic susceptibility for  $[\text{Ph}_4\text{P}[\text{Ni}(\text{L}^{\text{iPr}})]$  obtained with an applied field of 0.1 T (circles). Best fits to the data (red line) give  $g = 2.354$ ,  $D = -19.44 \text{ cm}^{-1}$ ,  $E = -1.46 \text{ cm}^{-1}$ ,  $\text{TIP} = 808 \times 10^{-6} \text{ emu} \cdot \text{mol}^{-1}$ , and relative error  $f = 0.018$ . Inset: Magnetization of  $\text{Ph}_4\text{P}[\text{Ni}(\text{L}^{\text{iPr}})]$  as a function of reduced magnetic field.

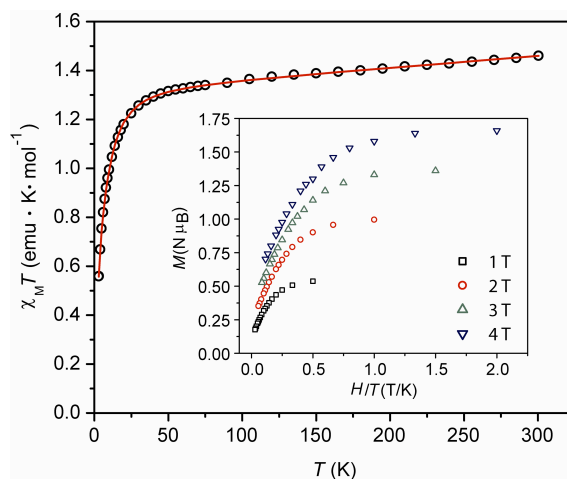

**Figure S3.** Low temperature expansion of magnetic susceptibility of  $[\text{Et}_4\text{N}]_3[\text{CoNi}(\text{L}^{\text{iPr}})_2(\mu_2\text{-CN})]$  collected at various fields.

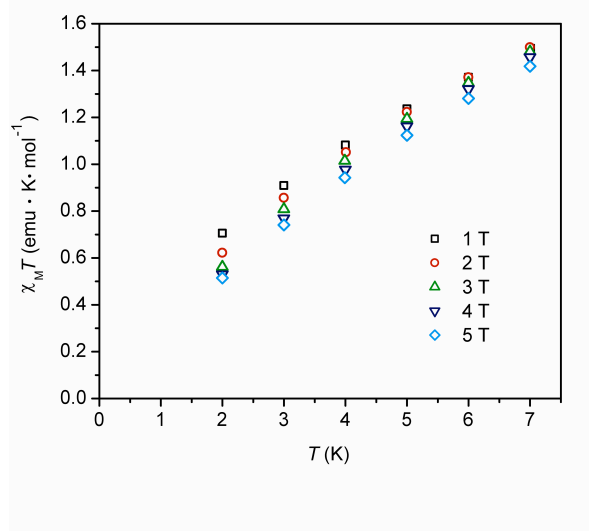

**Figure S4.** Magnetic susceptibility of  $[\text{Et}_4\text{N}]_3[\text{CoNi}(\text{L}^{\text{iPr}})_2(\mu_2\text{-CN})]$  (circles) measured with an applied field of 0.1 T. The fit (red line) was obtained with  $D$  fixed at  $10 \text{ cm}^{-1}$ .  $J = -1.56 \text{ cm}^{-1}$ ,  $g = 2.12$ ,  $D = 10 \text{ cm}^{-1}$  (fixed),  $\text{TIP} = 6.87 \times 10^{-3} \text{ emu} \cdot \text{mol}^{-1}$ ,  $f = 0.10$ .

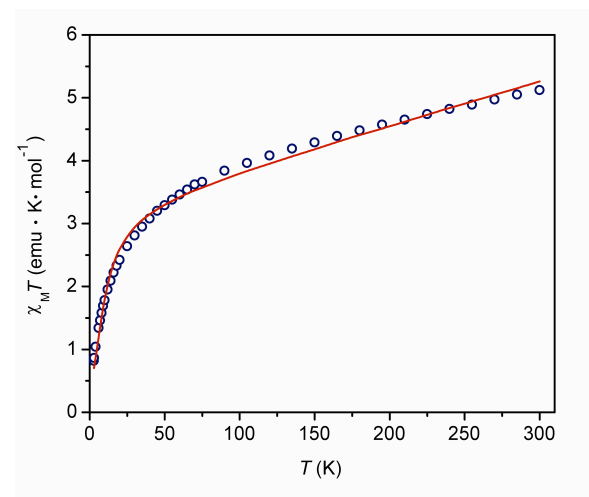

**Figure S5.** Magnetic susceptibility of  $[\text{Et}_4\text{N}]_3[\text{CoNi}(\text{L}^{\text{iPr}})_2(\mu_2\text{-CN})]$  (circles) measured with an applied field of 0.1 T. The fit (red line) was obtained with  $D$  allowed to refine freely.  $J = -1.49 \text{ cm}^{-1}$ ,  $g = 2.17$ ,  $D = 20 \text{ cm}^{-1}$ ,  $\text{TIP} = 6.21 \times 10^{-3} \text{ emu} \cdot \text{mol}^{-1}$ ,  $f = 0.067$ .

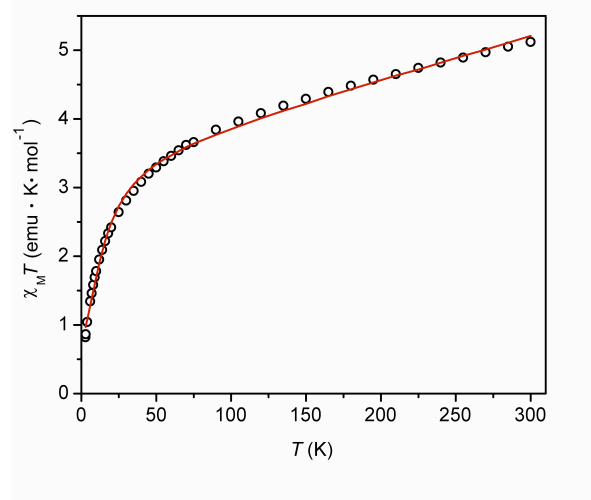

Supplement: b914301g.pdf [file b914301g.pdf]
